# Supplementary material
Source: PubMed Central journal article supplement (PMC7818655)
Supplement: es0c06806_si_001.pdf [file es0c06806_si_001.pdf]

## Supporting Information

### **Spatial and Spatiotemporal Variability of Regional Background Ultrafine Particle Concentrations in The Netherlands**

Esther van de Beek<sup>1#</sup>, Jules Kerckhoffs\*<sup>1#</sup>, Gerard Hoek<sup>1</sup>, Geert Sterk<sup>2</sup>, Kees Meliefste<sup>1</sup>, Ulrike Gehring<sup>1</sup>, Roel Vermeulen<sup>1,3</sup>.

<sup>1</sup> Institute for Risk Assessment Sciences (IRAS), Division of Environmental Epidemiology, Utrecht University, 3584 CK Utrecht, The Netherlands

<sup>2</sup> Department of Physical Geography, Utrecht University, 3508 TC Utrecht, The Netherlands

<sup>3</sup> Julius Center for Health Sciences and Primary Care, University Medical Center, University of Utrecht, 3584 CK Utrecht, The Netherlands

# Contributed equally

\* Corresponding author

This file includes 22 pages containing:

#### **Supplement A: Data correction (pages S2-S3):**

Table A.1: Ratios for all individual co-location measurements.

Table A.2: Individual 2-week average concentrations per site

#### **Supplement B: Spatial Analysis (pages S4-S6):**

Figure B.1: Fitted semi-variogram model through calculated semi-variance values of standardized UFP measurements in the Netherlands.

Table B.1: Fitted spherical semi-variogram models for three UFP measurement periods in the Netherlands.

Figure B.2. Maps of UFP regional background concentrations (particles/cm<sup>3</sup>) in the Netherlands produced by kriging.

Figure B.3-B.5: Scatterplots of UFP predictions.

#### **Supplement C: Spatiotemporal Analysis (pages S7-S22):**

Table C.1: Distance, Pearson and Spearman correlations, maximum cross-correlations and proportion of variance explained (PVE).

Table C.2: Influence of distance between sites on spatiotemporal correlation.

Figure C.1: Temporal variation of 2-hourly averaged UFP concentrations.

Figure C.2: Average diurnal pattern of UFP.

Table C.3: Difference in UFP between cold and warm season.

## Supplement A: Data Correction

Differences between devices were assessed by co-locating all 5 devices for 1-2 days before and after every two-week measurement. All devices were placed in a laboratory setting with all inlets connected to the same airstream. Concentrations were fluctuated between 0 and 100.000 particles/cm<sup>3</sup> throughout the colocation measurement. We corrected each measurement campaign based on calculated median ratios between the reference device and other devices of each co-located comparison. All individual ratios are shown in table A.1 with average medians ranging from 0,99 to 1,19.

**Table A.1: Ratios for all individual co-location measurements.**

| Date         | DM1:DM5     | DM2:DM5     | DM3:DM5     | DM4:DM5     |
|--------------|-------------|-------------|-------------|-------------|
| 06/09/2016   | 1,20        | 1,23        | 1,20        | 0,80        |
| 23/09/2016   | 1,16        | 1,16        | 1,07        | 0,85        |
| 26/09/2016   | /           | 1,19        | 1,15        | 0,85        |
| 13/10/2016   | 1,18        | 1,25        | 1,15        | 0,93        |
| 14/10/2016   | 1,10        | 1,23        | 1,12        | 0,96        |
| 07/11/2016   | 1,03        | 1,20        | 0,99        | 0,98        |
| 25/11/2016   | 0,94        | 1,13        | 1,01        | 0,88        |
| 29/11/2016   | 1,10        | 1,22        | 1,00        | 1,02        |
| 16/12/2016   | 1,22        | 1,20        | 0,99        | 1,01        |
| 21/12/2016   | 1,24        | 1,16        | 1,02        | 1,02        |
| 20/01/2017   | 1,14        | 1,22        | 0,94        | 1,01        |
| 23/01/2017   | 1,11        | 1,22        | 0,96        | 1,06        |
| 09/02/2017   | 1,12        | 1,23        | 0,98        | 0,98        |
| 10/02/2017   | 0,98        | 1,23        | 0,92        | 0,98        |
| 02/03/2017   | 1,13        | 1,17        | 1,04        | 1,05        |
| 23/03/2017   | 1,16        | 1,30        | 1,03        | 1,11        |
| 27/03/2017   | 1,18        | 1,27        | 1,08        | 1,12        |
| 28/03/2017   | 1,17        | 1,22        | 1,07        | 1,02        |
| 13/04/2017   | 1,19        | 1,26        | 1,13        | 1,05        |
| 10/07/2017   | 0,88        | 0,88        | 0,98        | 0,87        |
| 01/08/2017   | /           | 1,11        | 1,16        | 1,01        |
| 04/09/2017   | 1,17        | 1,20        | 1,47        | 1,20        |
| 03/10/2017   | 1,08        | 0,93        | 1,07        | 0,98        |
| 23/10/2017   | 1,25        | 1,18        | 1,09        | 1,01        |
| 14/11/2017   | 1,38        | 1,32        | 1,09        | 1,07        |
| <b>Total</b> | <b>1,14</b> | <b>1,19</b> | <b>1,07</b> | <b>0,99</b> |

### Temporal Correction

We used a reference site in the middle of the country (Bunnik) to correct for temporal variation. This reference site had the same restrictions as the sampling locations regarding potential local sources. Reference equipment was mounted into a bike-trailer and was placed at ground level in the back garden of a relatively secluded house.

The difference method we used is as follows:

1. Calculate the overall average UFP concentration on the reference site for the full study period.
2. Calculate for the reference site the difference between the overall average UFP concentration and each of the 15 averages of the measurement periods.
3. Add this difference to the time-corresponding individual site average concentrations on all sampling locations.

### Results

**Table A.2: Individual 2-week average concentrations per site**

| Site           | Round 1 | Round 2 | Round 3 | Total | Region |
|----------------|---------|---------|---------|-------|--------|
| Bedum          | 5569    | 3964    | /       | 4767  | North  |
| Budel          | 5914    | 5257    | /       | 5586  | South  |
| Burgerbrug     | 4800    | 4966    | 3637    | 4468  | North  |
| De Zilk        | 7908    | 5449    | /       | 6678  | West   |
| Donkerbroek    | /       | 4600    | 3028    | 3814  | North  |
| Grijpskerke    | 6215    | 5171    | 3854    | 5080  | South  |
| Huybergen      | 7658    | 7180    | 5355    | 6731  | South  |
| Lemelerveld    | 6065    | 4749    | /       | 5407  | East   |
| Mantgum        | /       | 4330    | /       | 4330  | North  |
| Maurik         | 8202    | 5565    | 4352    | 6040  | East   |
| Monnickendam   | 6593    | 5680    | 5064    | 5779  | West   |
| Odiliapeel     | 7723    | 6751    | 5252    | 6575  | South  |
| Oosterhesselen | 4717    | 4117    | /       | 4417  | North  |
| Rockanje       | 6477    | 5480    | 5121    | 5693  | West   |
| s Gravenmoer   | 7185    | 5530    | 5707    | 6141  | West   |
| Schimmert      | /       | 5228    | 5390    | 5309  | South  |
| Stolwijk       | 6561    | 5388    | /       | 5975  | West   |
| Swifterband    | /       | 3920    | 3899    | 3909  | East   |
| Voorthuizen    | 7584    | 7599    | 6056    | 7080  | East   |
| Zelhem         | 6153    | 5388    | 4300    | 5280  | East   |

*Concentrations in particles/cm<sup>3</sup>*

## Supplement B: Spatial Analysis

### *Geostatistics*

Geostatistics can be applied to create maps of a spatially sampled property, a so-called regionalized variable (Cressie, 1991). The most widely used geostatistical technique is kriging, which provides estimates with minimum error variance of the regionalized variable at unsampled locations (Davis, 2002). In order to apply kriging, first the spatial correlation between observations of the regionalized variable needs to be quantified. The concept used in geostatistics is that observations of a regionalized variable at locations that are close to each other are more similar than observations that are further apart. This spatial correlation can be quantified with the semi-variogram, which is a model of the semi-variance between spatial observations at a certain distance apart (the lag distance). In a 2-dimensional plane the semi-variance between pairs of observations ( $z_i, z_{i+h}$ ) which are separated by a distance falling in a distance class  $h$  is calculated as (Davis, 2002):

$$\gamma_h = \frac{1}{2} \frac{\sum_{i=1}^{Nh} (z_i - z_{i+h})^2}{Nh} \quad S1$$

where  $\gamma_h$  is the semi-variance at lag distance class  $h$ , and  $Nh$  is the total number of observation pairs in lag distance class  $h$ . By fitting an equation through the calculated semi-variogram a model of the semi-variance is obtained. This model is characterized by three parameters: the nugget, the range and the sill. The nugget is the semi-variance at distance zero. In theory this semi-variance is zero, but due to measurement errors or spatial variation at small lag distances that are not included in the observations there can be a non-zero semi-variance. The range of the semi-variogram is the spatial distance over which spatial correlation exists. Beyond the range any two point are no longer related to each other. The sill is the semi-variance that is reached at the range. It is approximately equal to the variance of all observations.

Webster and Oliver (1992) recommended that semi-variograms should be computed using at least 50 observations, but preferably 100 or more observations of the regionalized variable should be used. In practice, often less observations of a regionalized variable are available due to varying problems, such as lack of instruments, time and financial resources. To overcome this problem of an insufficient number of observations, Sterk and Stein (1997) developed a space-time procedure to compute stable semi-variograms. In their procedure multiple events with observations of the regionalized variable taken at different moments in time are used to calculate a standardized semi-variogram. This standardized semi-variogram is subsequently converted to an event-based semi-variogram, by recalculating the nugget and sill, which are proportional to the variance of the observations for the event. The range of the semi-variograms is assumed equal for all events, assuming that the spatial correlation structure is unchanged. The Sterk and Stein (1997) space-time procedure was used in this study to calculate separate semi-variograms for each of the three UFP measurement times.

In the first step the average concentrations per location and measurement period were standardized by withdrawing the mean of all 49 observations from each individual observation, and by dividing with the standard deviation of all 49 observations. The semi-variogram was calculated using equation S1,

but to avoid that calculations between the observations at the three measurement periods were used, the coordinates were shifted 1000 km per time interval. The maximum distance of pairs of observations was set at 500 km, which guaranteed that only pairs of observations within a certain time period were used. A spherical model was fitted through the computed standardized semi-variogram values (figure S1). The spherical model is defined as (Davis, 2002):

$$\begin{aligned} \gamma_h &= \gamma_0 + (\sigma_0^2 - \gamma_0) \left( \frac{3h}{2a} - \frac{h^3}{2a^3} \right) & \text{for } h < a \\ \gamma_h &= \sigma_0^2 & \text{for } h \geq a \end{aligned} \quad S2$$

where  $\gamma_0$  is the nugget,  $\sigma_0^2$  is the sill and  $a$  is the range of the semi-variogram.

**Figure B.1: Fitted semi-variogram model through calculated semi-variance values of standardized UFP measurements in the Netherlands.**

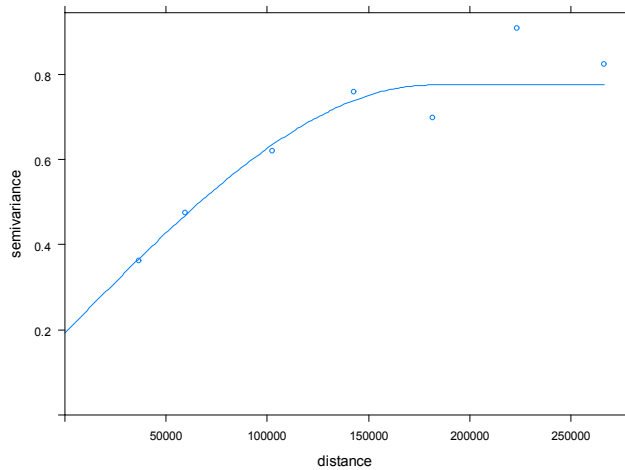

The fitted spherical model has a range of 180.9 km, which indicates the presence of spatial correlation up until 181 km. The nugget and sill values are respectively 0.193 and 0.582. The standardized semi-variogram was converted into three semi-variograms, one for each measurement time. This was done by multiplying the nugget and sill of the standardized semi-variogram with the variance of the UFP values per measurement time, while the range was kept constant. The parameters of the three spherical semi-variogram models are provided in Table B.1.

**Table B.1: Fitted spherical semi-variogram models for three UFP measurement periods in the Netherlands.**

| Observation time | Spherical semi-variogram                          |                                                 |           |
|------------------|---------------------------------------------------|-------------------------------------------------|-----------|
|                  | Nugget (particles cm <sup>-3</sup> ) <sup>2</sup> | Sill (particles cm <sup>-3</sup> ) <sup>2</sup> | Range (m) |
| Round 1          | 217606                                            | 657807                                          | 180893    |
| Round 2          | 184765                                            | 558532                                          | 180893    |
| Round 3          | 151692                                            | 458553                                          | 180893    |

The three semi-variogram models and the original UFP concentrations of every measurement period were used to make three separate kriging maps, applying ordinary kriging (Davis, 2002):

$$\hat{Z}(x_o) = m + \sum_{i=1}^k \lambda_i [Z(x_i) - m]$$

where  $\hat{Z}(x_o)$  is the kriging estimate at position  $x_o$ ,  $m$  is the mean of the observations,  $\lambda_i$  are the kriging weights, and  $Z(x_i)$  the UFP observations. The kriging weights are calculated using the semi-variogram model, and determine the weight of each observation for the kriging estimate. A raster was used with a cell size of 500 x 500m. The three produced kriging maps (Figure B.2) were then averaged in ArcGIS pro, to create one final mean kriging map of the Netherlands. Kriging error maps (i.e. the variance of the kriging estimates) for each measurement period were made to estimate the uncertainty of the kriging prediction over the area (Figure B.2). In sensitivity analysis we performed a leave-one-out-cross-validation to further analyse potential error in the map. While deletion of a site would affect the standardisation procedure and development of the variogram, we assumed these to be unchanged. So, we created 20 kriging maps, each based on 19 sites and the same variogram. Predictions made for the remaining site was then compared to the same site in the kriging map with all 20 sites included. Results are shown in figure B.3. All geostatistical analyses were done using the gstat package in R.

#### *References:*

- Cressie, N.A.C. 1991. Statistics for Spatial Data. John Wiley & Sons, New York
- Davis, J.C. 2002. Statistics and Data Analysis in Geology, 3<sup>rd</sup> Edition. John Wiley & Sons, New York.
- Sterk, G. and A. Stein. 1997. Mapping wind-blown mass transport by modeling variability in space and time. Soil Science Society of America Journal 61: 232-239.
- Webster R. and M.A. Oliver 1992. Sample adequately to estimate variograms of soil properties. Journal of Soil Science 43: 177-192.

Figure B.2. Top: Maps of UFP regional background concentrations (particles/cm<sup>3</sup>) in the Netherlands produced by kriging. Dates of measurement periods are June 8 – Nov 23 2016 (Round 1), Nov 30 2016 – Mar 22 2017 (Round 2) and Mar 29 - Nov 8 2017 (Round 3). Bottom: Maps of the kriging variance for the corresponding periods, providing a measure of the uncertainty of the kriging estimates in the top row figures. Values are the root of the standard error.

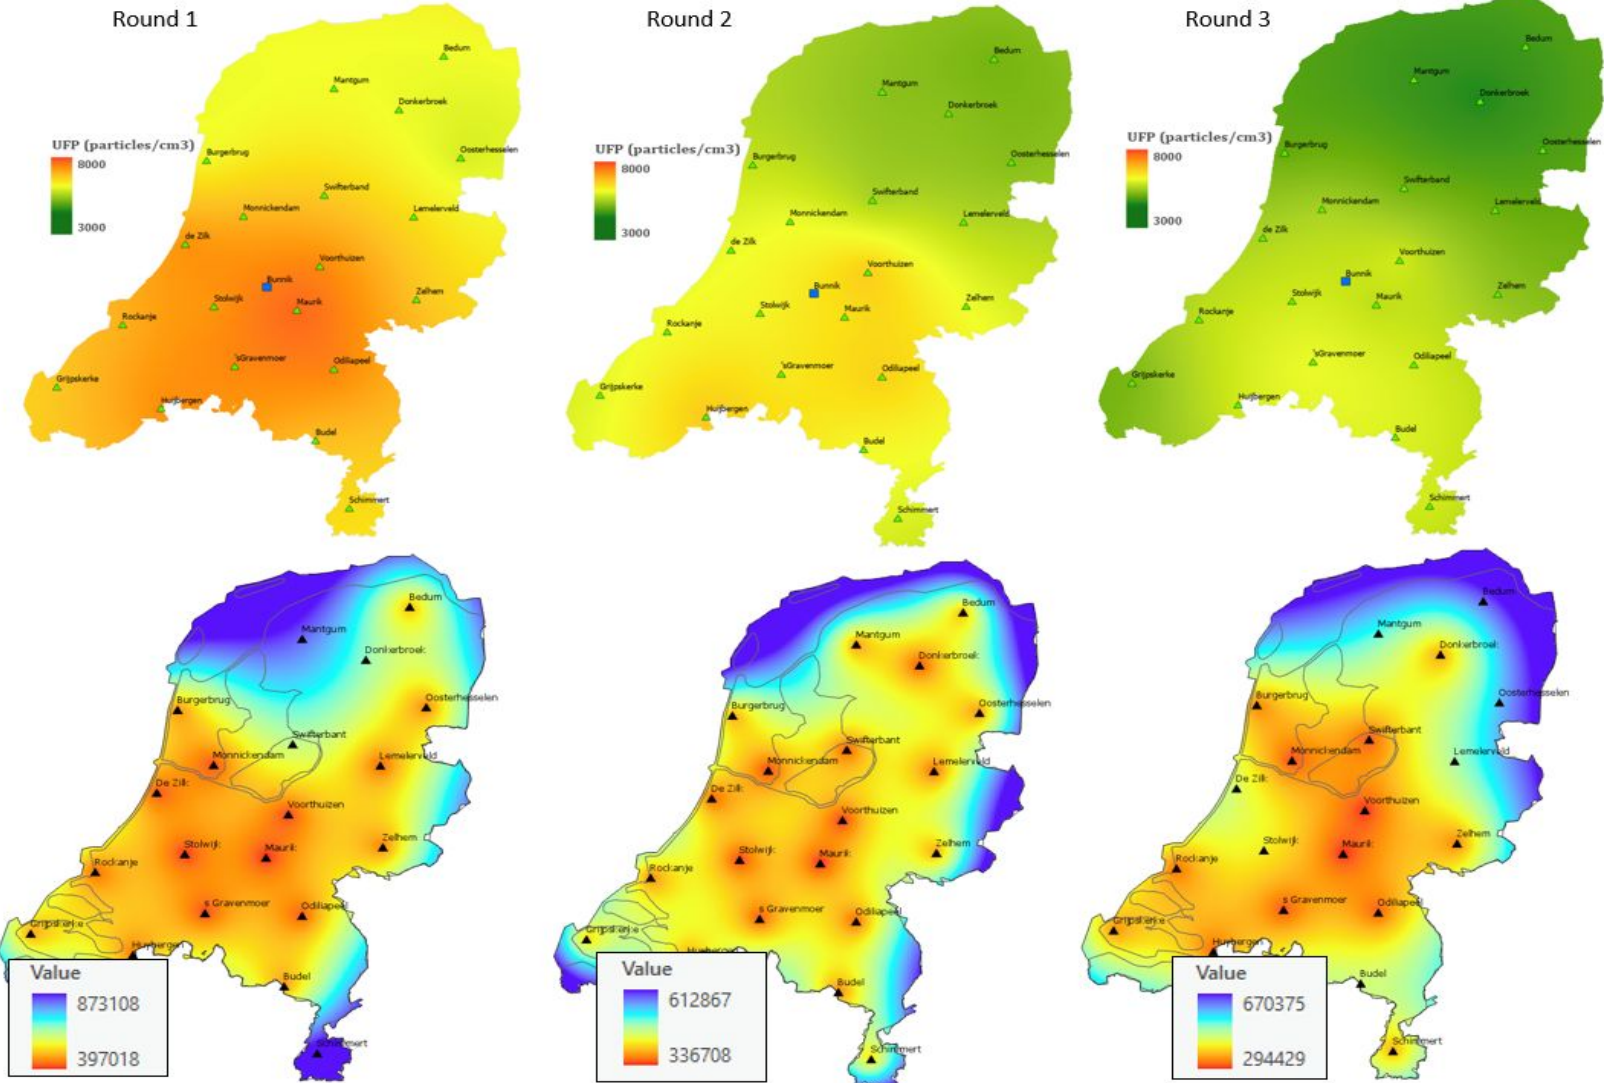

**Figure B.3: Scatterplot of UFP predictions generated by leave-one-out-cross-validation and kriged values with the full data set.**

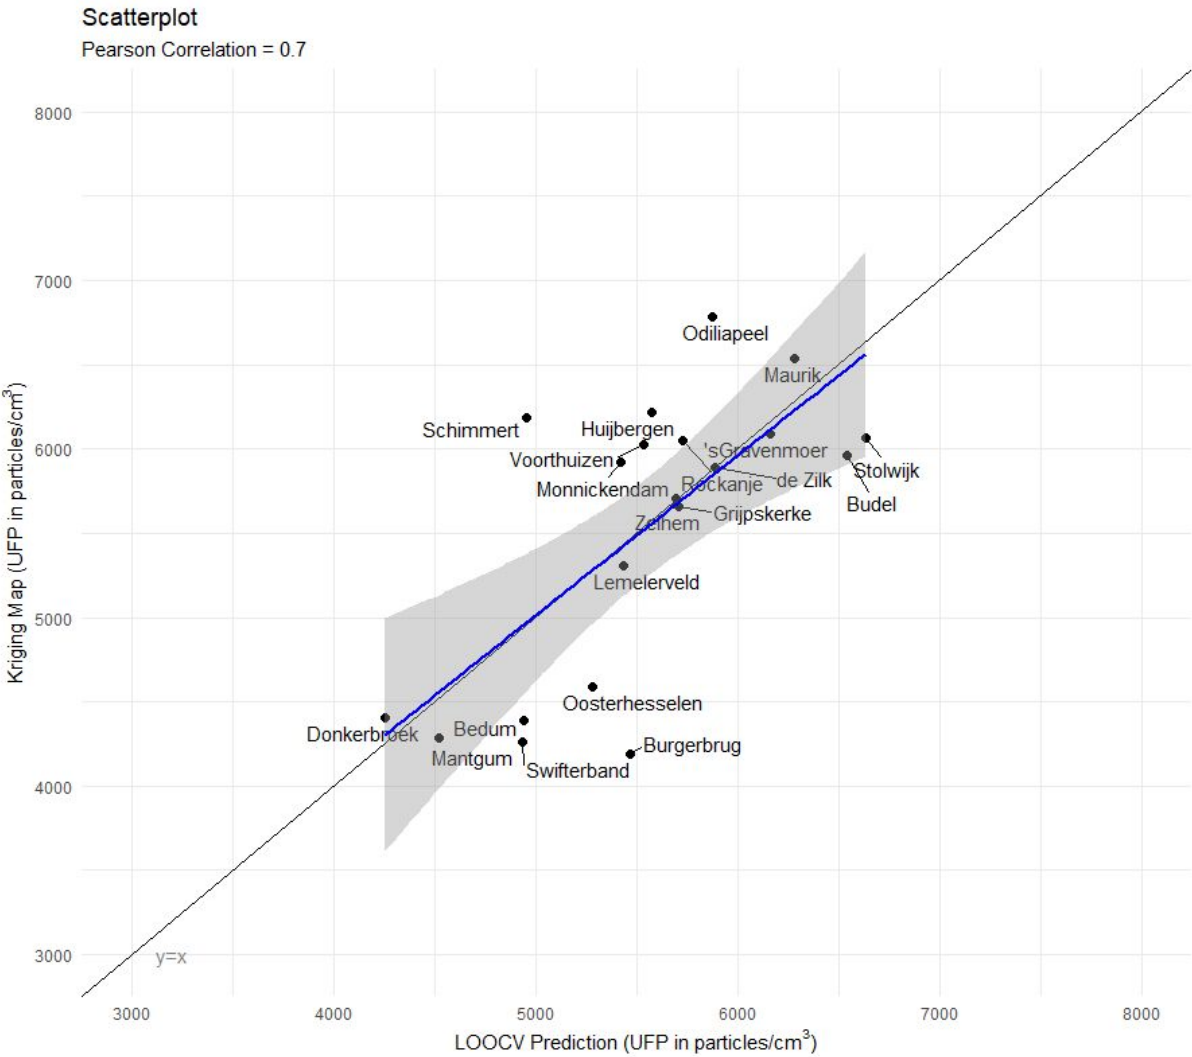



**Figure B.4: Scatterplot of UFP predictions generated by leave-one-out-cross-validation and measured concentrations.**

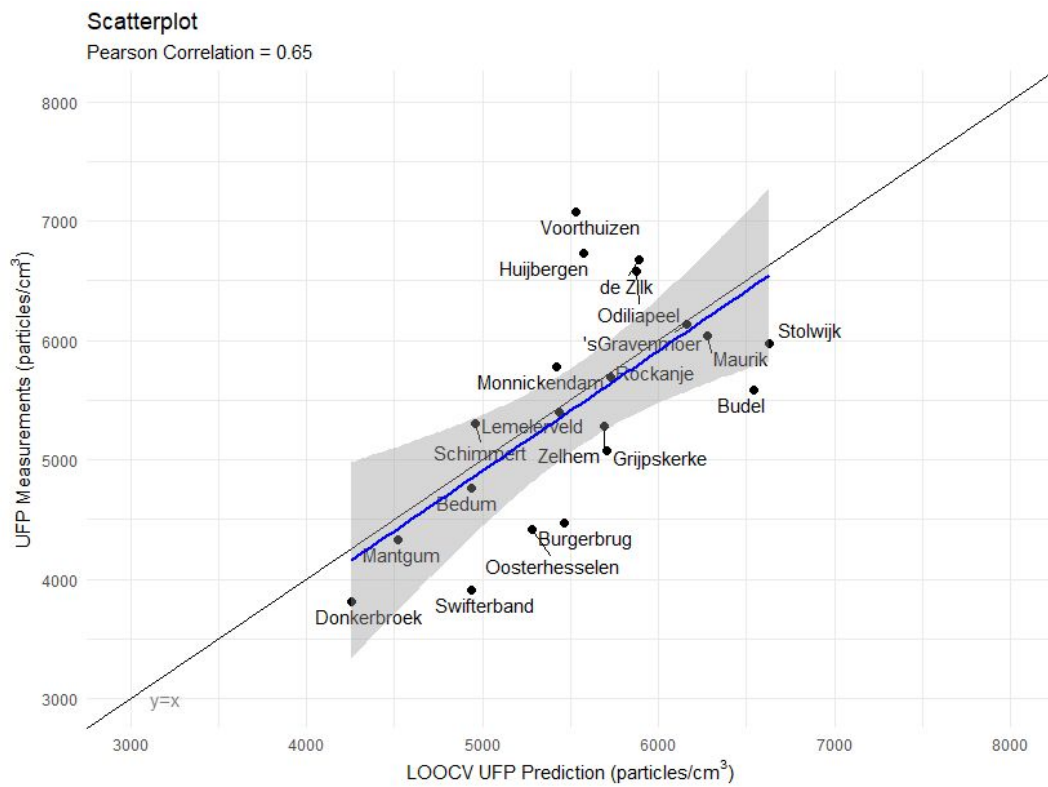

**Figure B.5: Scatterplot of UFP concentrations generated by kriging with the measured concentrations.**

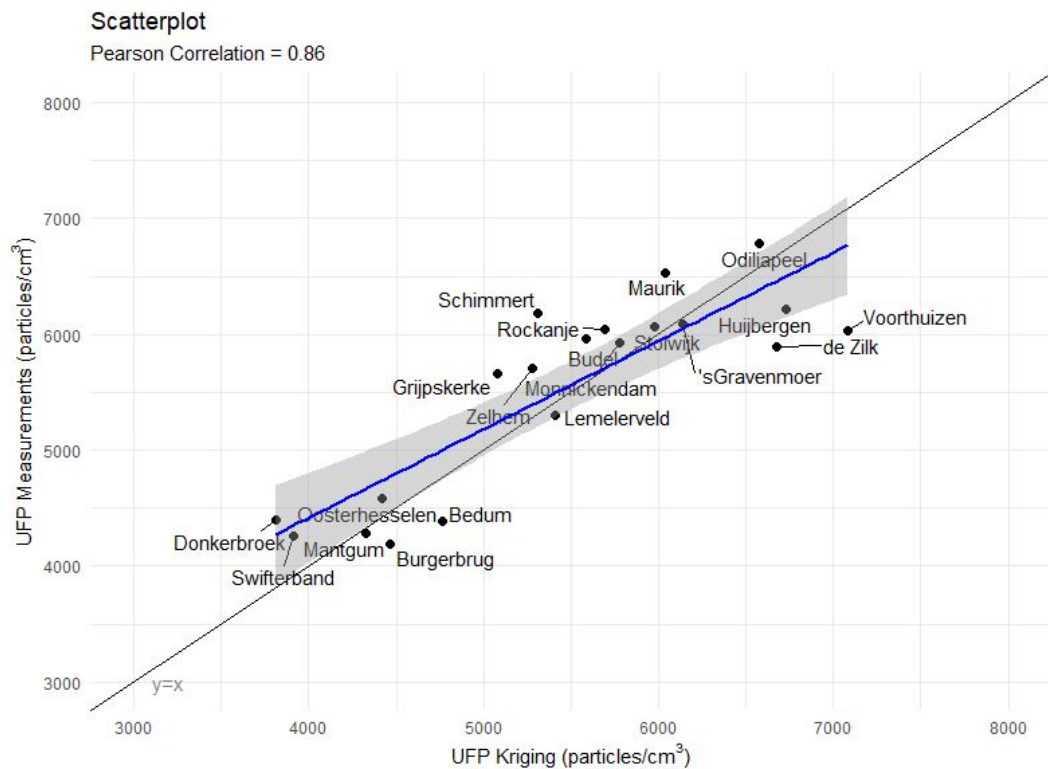

## Supplement C: Spatiotemporal analysis

**Table C.1: Distance, Pearson and Spearman correlations, maximum cross-correlations and proportion of variance explained (PVE), between the sampling locations and the reference site (Bunnik).**

| Site           | Distance | Pearson | Spearman | 2hr Cross-Correlation | Time lag (Hours) | 24hr Cross-Correlation | PVE 2hr | PVE 24hr |
|----------------|----------|---------|----------|-----------------------|------------------|------------------------|---------|----------|
| Bedum          | 165      | 0,59    | 0,50     | 0,59                  | 0                | 0,39                   | 0,33    | 0,15     |
|                | 165      | 0,58    | 0,57     | 0,58                  | 0                | 0,52                   | -0,13   | 0,02     |
| Budel          | 100      | 0,42    | 0,38     | 0,44                  | 1                | 0,26                   | 0,11    | 0,05     |
|                | 100      | 0,54    | 0,64     | 0,55                  | 1                | 0,56                   | 0,08    | 0,27     |
| Burgerbrug     | 77       | 0,43    | 0,53     | 0,45                  | 1                | 0,40                   | -0,25   | 0,11     |
|                | 77       | 0,57    | 0,62     | 0,58                  | 0,5              | 0,66                   | 0,27    | 0,41     |
|                | 77       | 0,36    | 0,38     | 0,46                  | 2 <sup>‡</sup>   | 0,58                   | -0,05   | 0,15     |
| De Zilk        | 46       | -0,05   | -0,05    | -0,24                 | 3 <sup>‡</sup>   | -0,24                  | -0,41   | -0,28    |
|                | 46       | 0,44    | 0,44     | 0,45                  | -0,5             | 0,33                   | -0,06   | 0,00     |
| Donkerbroek    | 125      | 0,63    | 0,68     | 0,67                  | 1,5              | 0,67                   | -0,06   | 0,37     |
|                | 125      | 0,61    | 0,62     | 0,61                  | -0,5             | 0,65                   | -0,03   | 0,39     |
| Grijpskerke    | 125      | 0,28    | 0,27     | 0,33                  | -1,5             | 0,38                   | -0,16   | -0,04    |
|                | 125      | 0,48    | 0,51     | 0,49                  | 0,5              | 0,57                   | -0,31   | 0,22     |
|                | 125      | 0,23    | 0,34     | 0,25                  | -1,5             | 0,23                   | -0,47   | -0,02    |
| Huijbergen     | 92       | 0,60    | 0,66     | 0,60                  | 0                | 0,56                   | 0,36    | 0,27     |
|                | 92       | 0,53    | 0,55     | 0,54                  | 0,5              | 0,48                   | 0,20    | 0,17     |
|                | 92       | 0,45    | 0,50     | 0,45                  | 0,5              | 0,53                   | -0,22   | 0,12     |
| Lemelerveld    | 90       | 0,73    | 0,70     | 0,73                  | 0                | 0,54                   | 0,47    | 0,29     |
|                | 90       | 0,67    | 0,63     | 0,67                  | 0                | 0,63                   | 0,31    | 0,34     |
| Mantgum        | 120      | 0,63    | 0,65     | 0,63                  | 0                | 0,65                   | 0,22    | 0,36     |
| Maurik         | 25       | 0,35    | 0,87     | 0,38                  | -1,5             | 0,17                   | 0,12    | 0,03     |
|                | 25       | 0,90    | 0,90     | 0,90                  | 0                | 0,75                   | 0,78    | 0,55     |
|                | 25       | 0,70    | 0,71     | 0,70                  | 0                | 0,50                   | 0,36    | 0,24     |
| Monnickendam   | 40       | 0,57    | 0,35     | 0,58                  | -1               | 0,38                   | 0,32    | 0,13     |
|                | 40       | 0,53    | 0,66     | 0,53                  | 0                | 0,51                   | 0,20    | 0,23     |
|                | 40       | 0,49    | 0,51     | 0,49                  | 0                | 0,49                   | 0,07    | 0,19     |
| Odiliapeel     | 65       | 0,73    | 0,74     | 0,74                  | -0,5             | 0,61                   | 0,49    | 0,37     |
|                | 65       | 0,66    | 0,65     | 0,66                  | 0                | 0,60                   | 0,38    | 0,36     |
|                | 65       | 0,53    | 0,53     | 0,55                  | 1                | 0,45                   | 0,12    | 0,19     |
| Oosterhesselen | 130      | 0,44    | 0,47     | 0,48                  | -1               | 0,43                   | -0,53   | -0,21    |
|                | 130      | 0,44    | 0,42     | 0,47                  | 1,5              | 0,33                   | -0,30   | -0,03    |
| Rockanje       | 78       | 0,32    | 0,42     | 0,36                  | -2,5             | 0,36                   | -0,23   | 0,12     |
|                | 78       | 0,45    | 0,59     | 0,46                  | 0,5              | 0,55                   | 0,15    | 0,24     |
|                | 78       | 0,34    | 0,35     | 0,34                  | 0                | 0,25                   | -0,57   | -0,20    |
| s'Gravenmoer   | 52       | 0,70    | 0,71     | 0,70                  | 0                | 0,52                   | 0,47    | 0,23     |
|                | 52       | 0,63    | 0,65     | 0,63                  | 0                | 0,59                   | 0,09    | 0,33     |
|                | 52       | 0,63    | 0,65     | 0,63                  | 0                | 0,30                   | 0,23    | 0,03     |
| Schimmert      | 142      | 0,44    | 0,48     | 0,45                  | -1               | 0,43                   | -0,14   | 0,05     |
|                | 142      | 0,42    | 0,41     | 0,42                  | 0,5              | 0,41                   | -0,32   | 0,04     |
| Stolwijk       | 28       | 0,78    | 0,83     | 0,78                  | 0                | 0,56                   | 0,59    | 0,31     |
|                | 28       | 0,74    | 0,74     | 0,74                  | -0,5             | 0,59                   | 0,29    | 0,24     |
| Swifterband    | 62       | 0,71    | 0,67     | 0,72                  | 0,5              | 0,69                   | 0,05    | 0,40     |
|                | 62       | 0,29    | 0,39     | 0,30                  | 1                | 0,41                   | -0,60   | -0,10    |
| Voorthuizen    | 32       | 0,66    | 0,76     | 0,67                  | 0,5              | 0,62                   | 0,42    | 0,29     |
|                | 32       | 0,60    | 0,66     | 0,60                  | 0                | 0,58                   | 0,36    | 0,28     |
|                | 32       | 0,59    | 0,57     | 0,59                  | 0                | 0,59                   | 0,31    | 0,30     |
| Zelhem         | 84       | 0,44    | 0,50     | 0,50                  | 2                | 0,26                   | 0,12    | 0,04     |
|                | 84       | 0,72    | 0,71     | 0,72                  | 0                | 0,67                   | 0,21    | 0,41     |
|                | 84       | 0,62    | 0,63     | 0,65                  | 1                | 0,61                   | 0,15    | 0,36     |

<sup>‡</sup>Lag was limited to 3 hours maximum

**Table C.2: Influence of distance between sites on spatiotemporal correlation, with log-transformed UFP concentrations.**

| <b>Distance between sites</b> | <b>Median Pearson correlation 2h</b> | <b>Median cross correlation 2h</b> | <b>Median cross correlation 24h</b> | <b>Median PVE 2h</b> | <b>Median PVE 24h</b> |
|-------------------------------|--------------------------------------|------------------------------------|-------------------------------------|----------------------|-----------------------|
| <b>&lt; 50 km</b>             | 0,69                                 | 0,69                               | 0,60                                | 0,47                 | 0,35                  |
| <b>50 - 80km</b>              | 0,61                                 | 0,62                               | 0,53                                | 0,24                 | 0,24                  |
| <b>&gt; 80km</b>              | 0,55                                 | 0,56                               | 0,52                                | 0,18                 | 0,23                  |

**Figure C.1: Temporal variation of 2-hourly averaged UFP concentrations (particles/cm<sup>3</sup>) at the reference site (black) and the sampling locations (brown).**

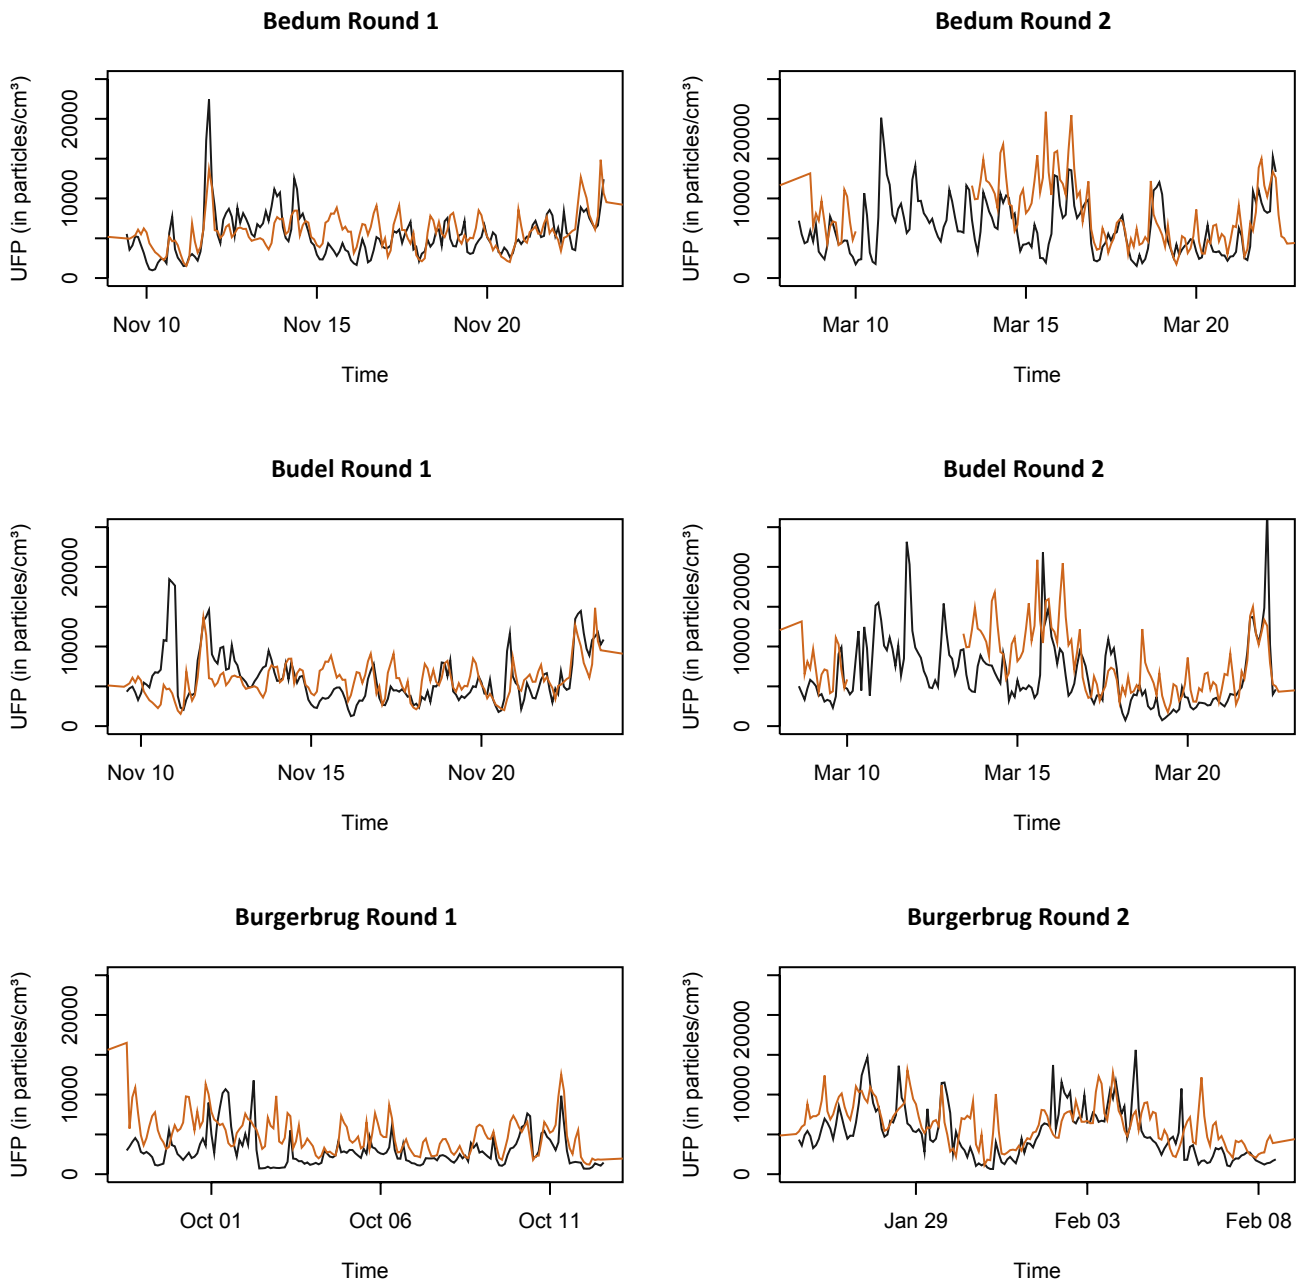

**Burgerbrug Round 3**

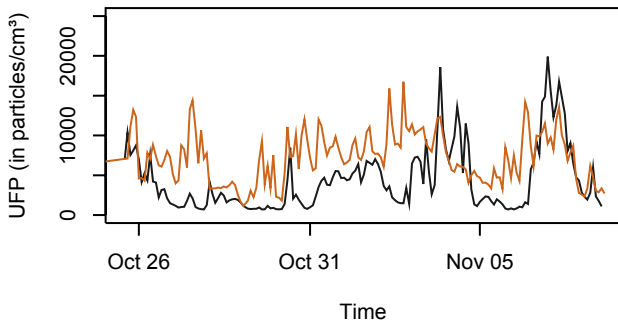

**DeZilk Round 1**

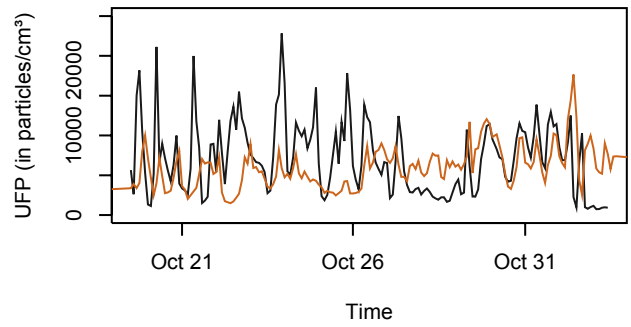

**DeZilk Round 2**

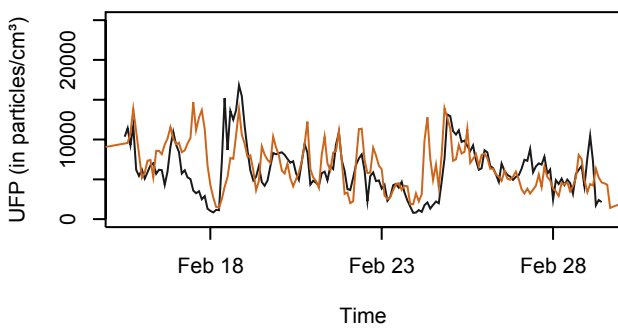

**Donkerbroek Round 2**

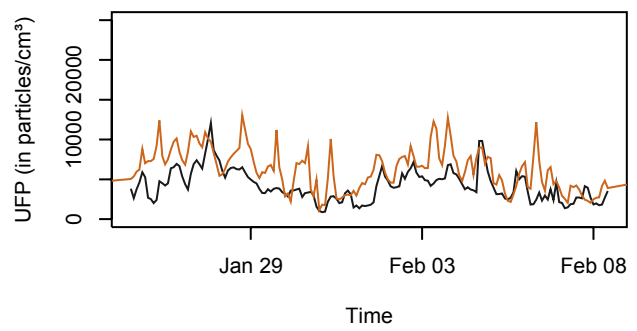

**Donkerbroek Round 3**

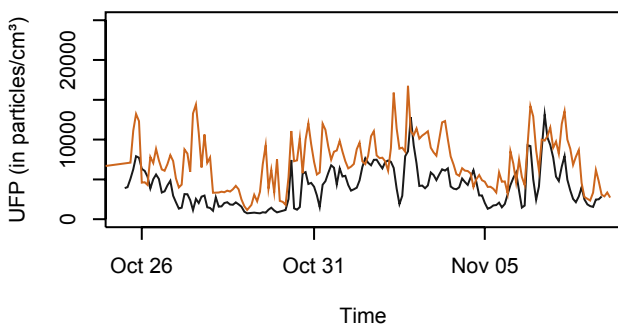

**Grijpskerke Round 1**

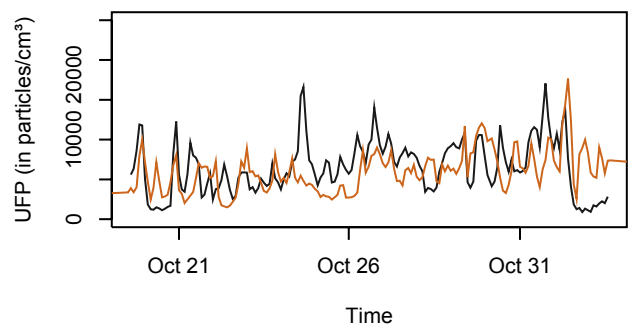

**Grijpskerke Round 2**

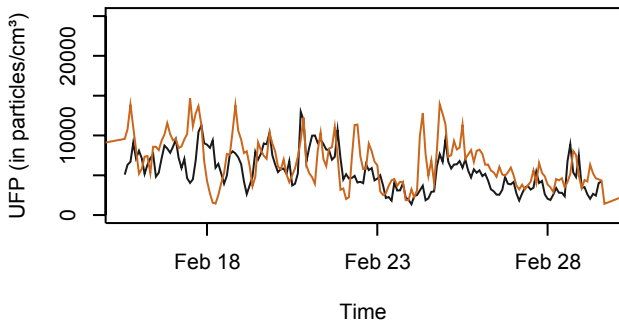

**Grijpskerke Round 3**

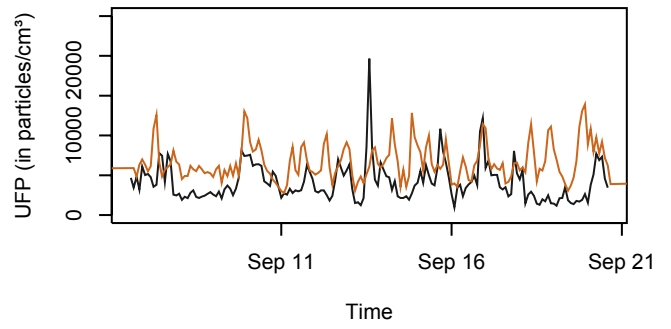

**Huiberger Round 1**

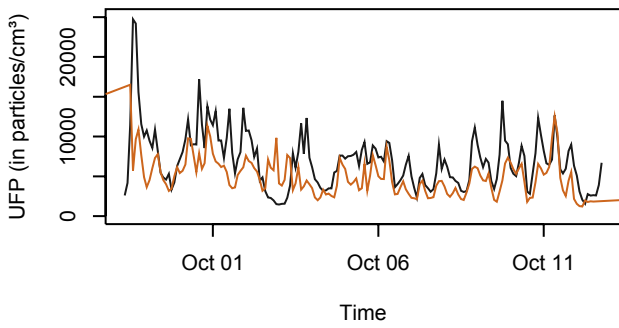

**Huiberger Round 2**

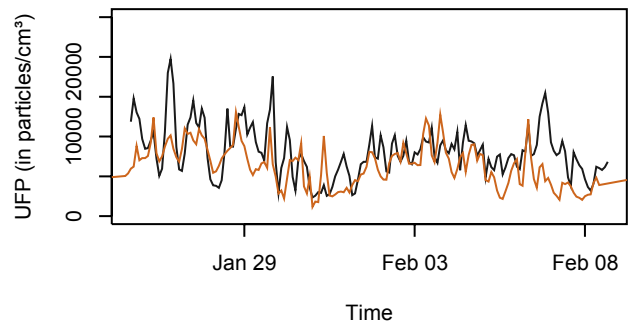

**Huiberger Round 3**

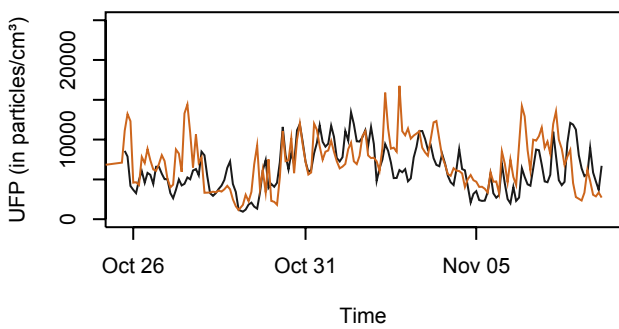

**Lemelerveld Round 1**

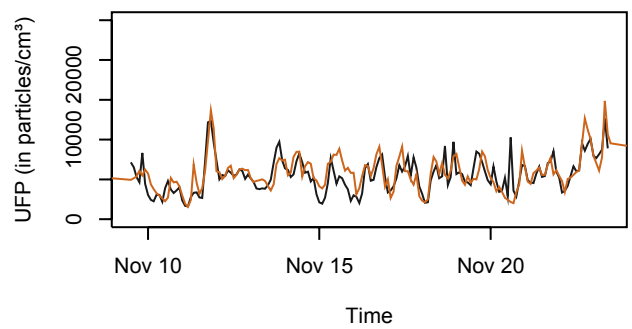

**Lemelerveld Round 2**

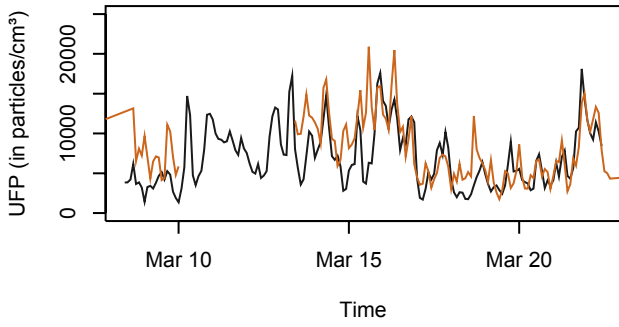

**Mantgum Round 2**

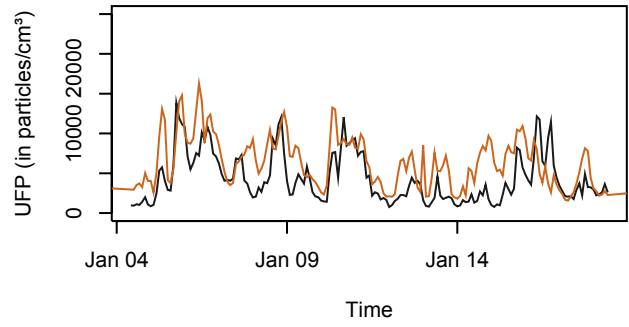

**Maurik Round 1**

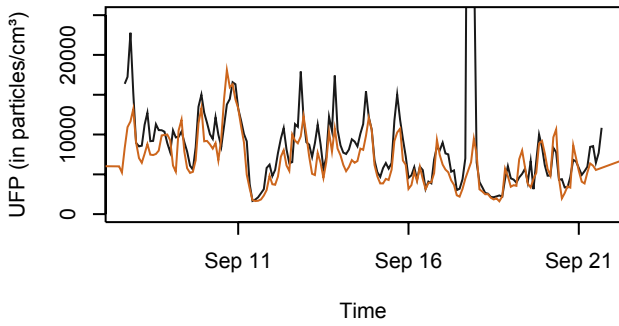

**Maurik Round 2**

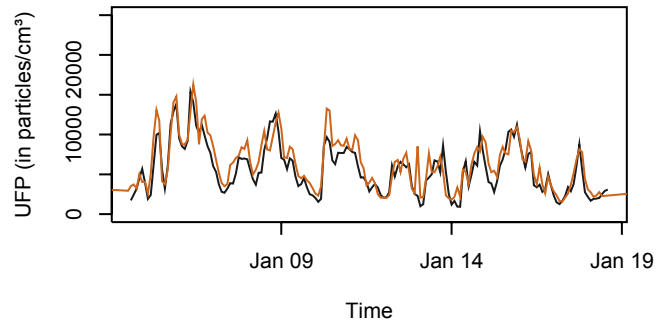

**Maurik Round 3**

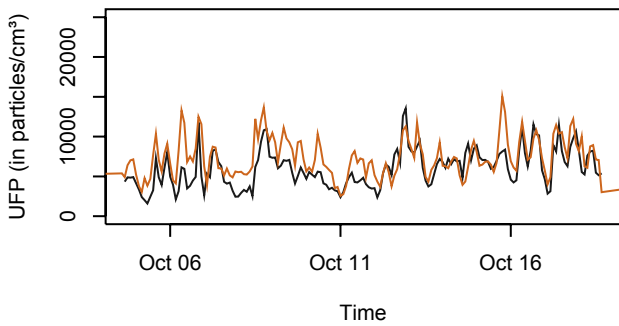

**Monnickendam Round 1**

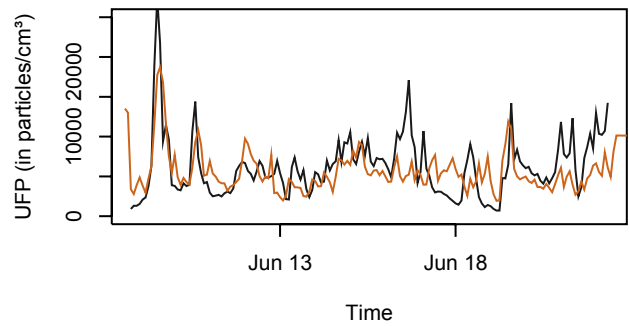

**Monnickendam Round 2**

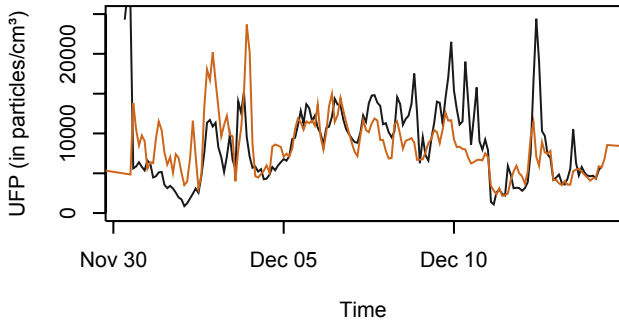

**Monnickendam Round 3**

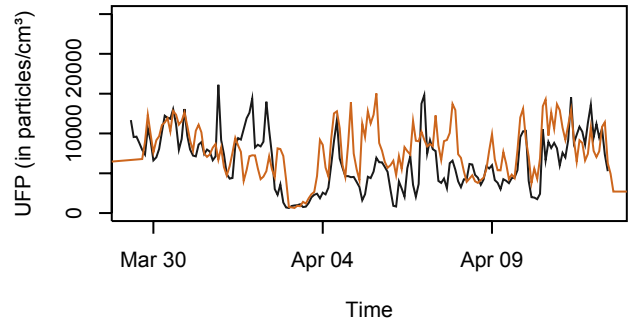

**Odiliapeel Round 1**

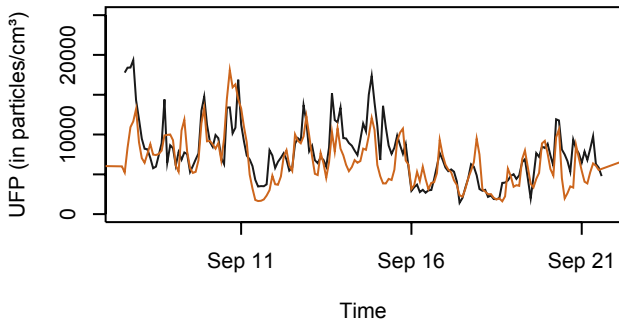

**Odiliapeel Round 2**

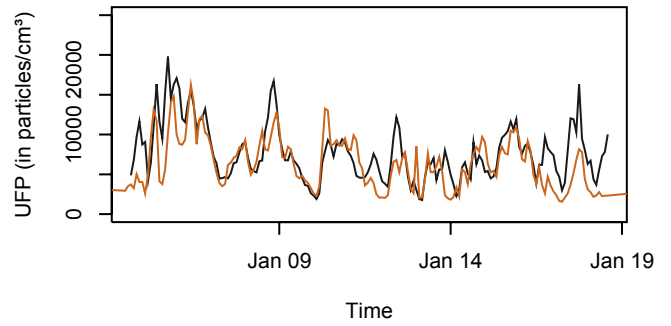

**Odiliapeel Round 3**

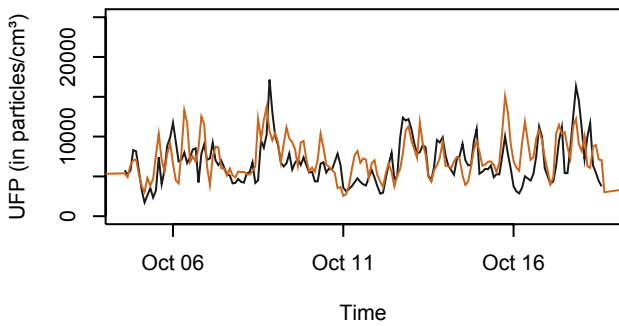

**Oosterhesselen Round 1**

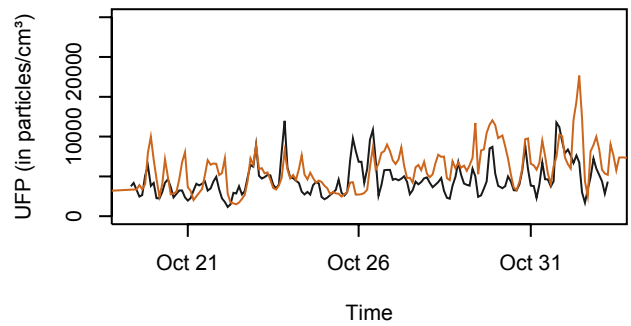



**Oosterhesselen Round 2**

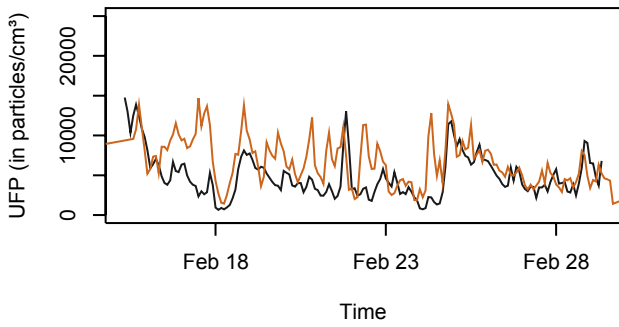

**Rockanje Round 1**

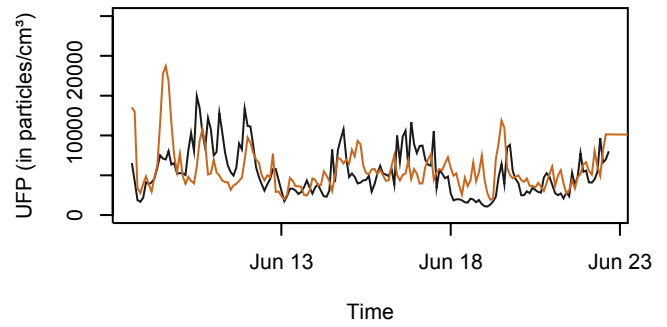

**Rockanje Round 2**

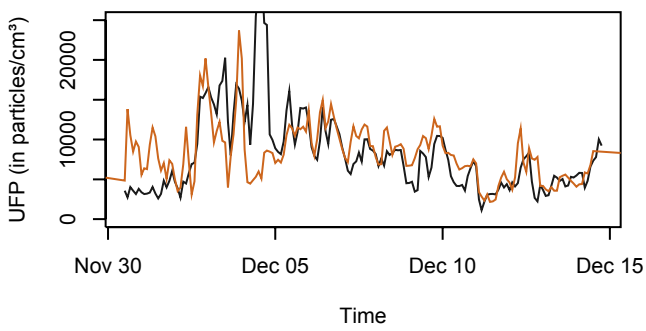

**Rockanje Round 3**

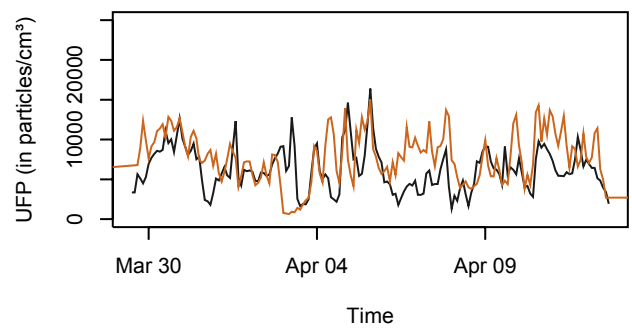

**sGravenmoer Round 1**

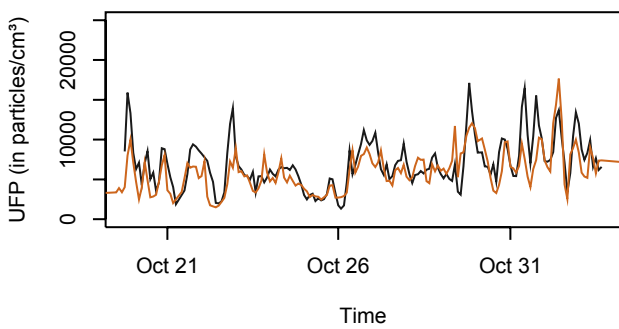

**sGravenmoer Round 2**

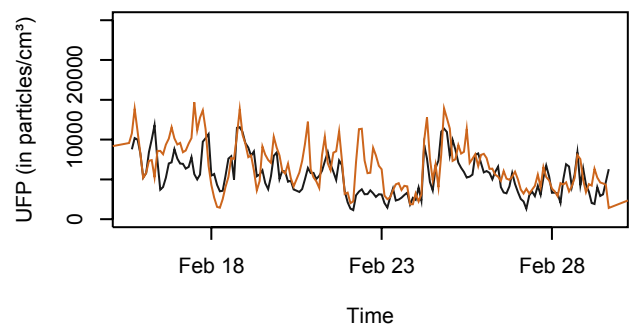

**sGravenmoer Round 3**

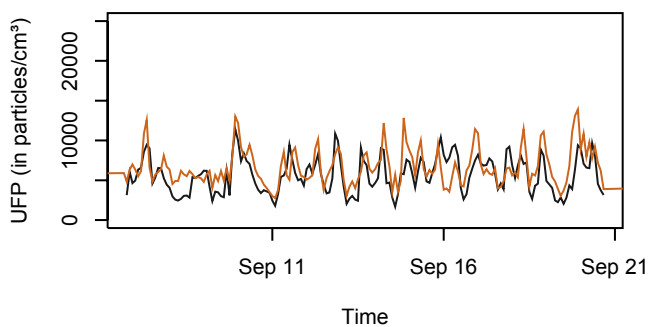

**Schimmert Round 2**

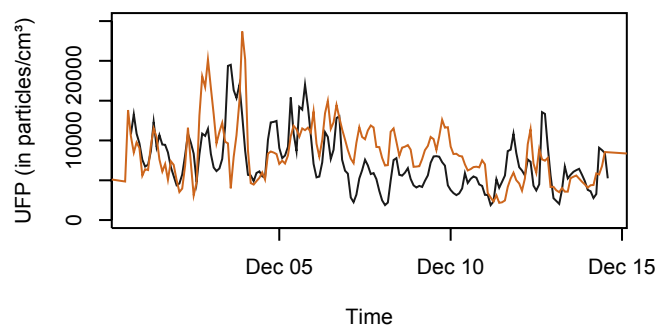

**Schimmert Round 3**

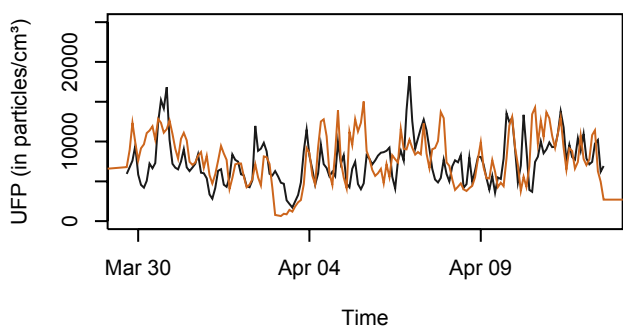

**Stolwijk Round 1**

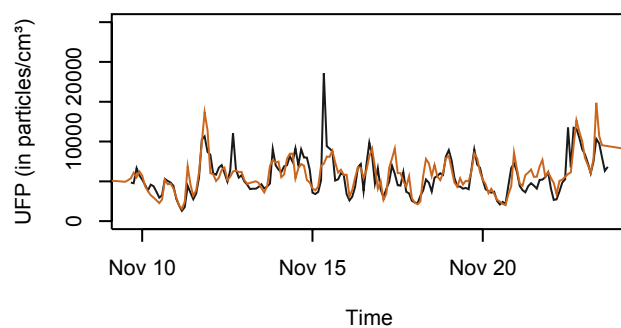

**Stolwijk Round 2**

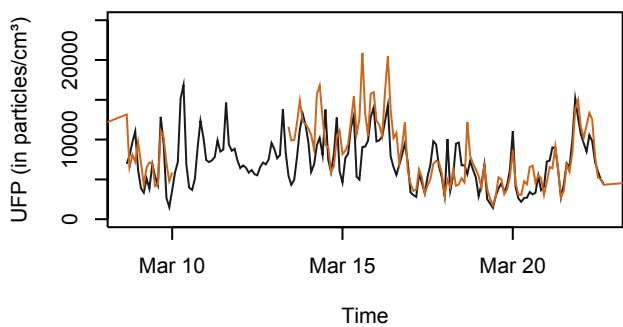

**Swifterband Round 2**

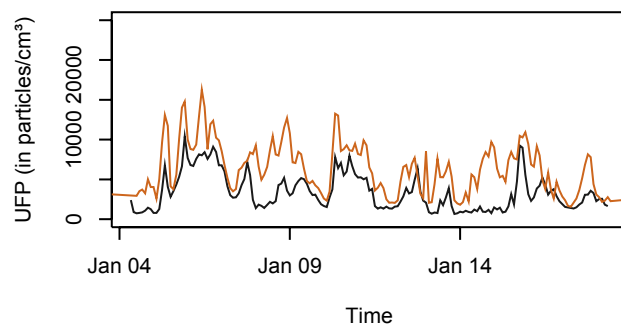

**Swifterband Round 3**

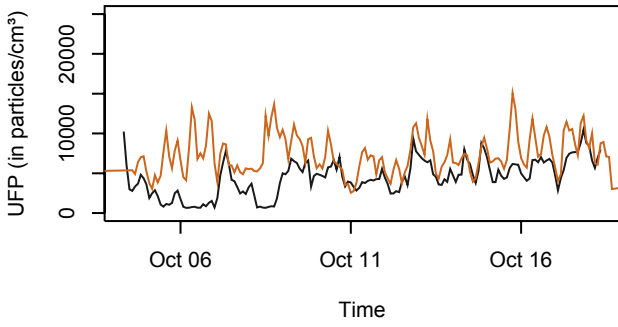

**Voorthuizen Round 1**

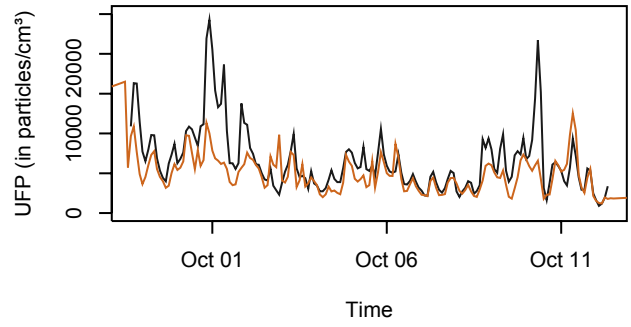

**Voorthuizen Round 2**

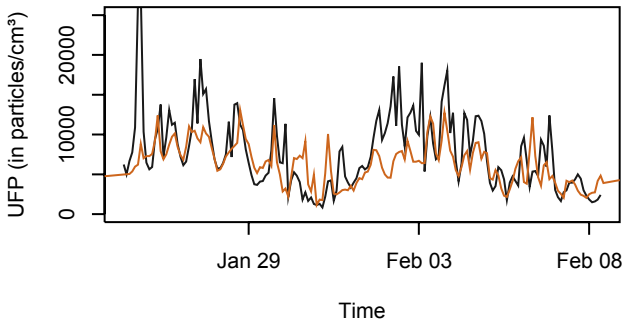

**Voorthuizen Round 3**

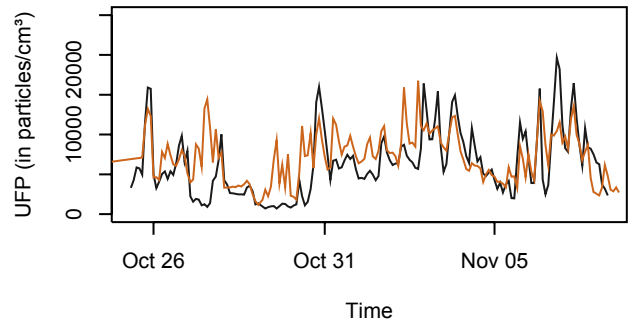

**Zelhem Round 1**

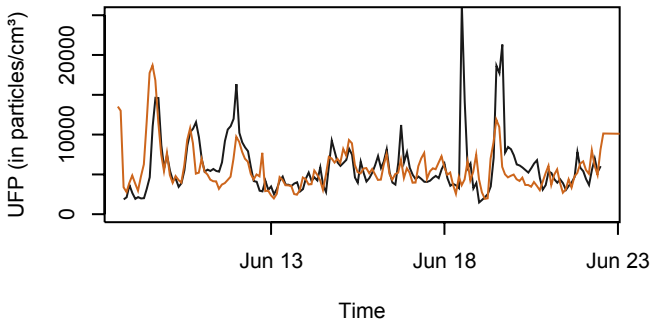

**Zelhem Round 2**

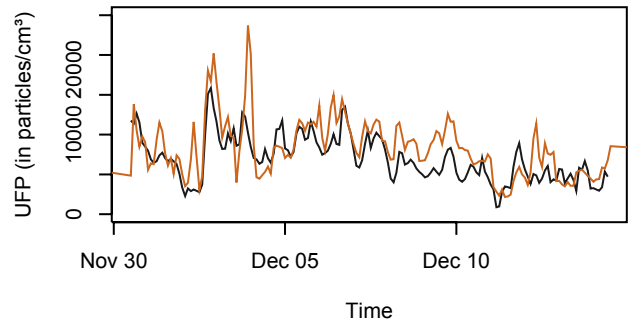

### Zelhem Round 3

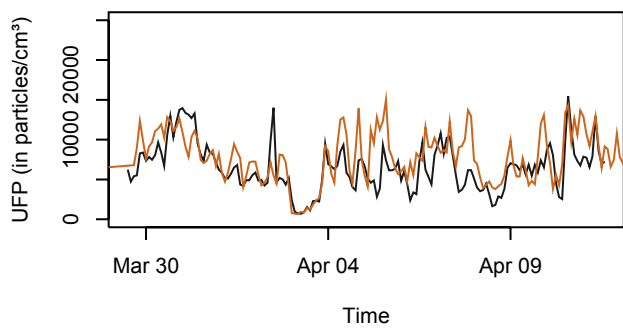

Figure C.2: Average diurnal pattern of UFP for all sites. Reference site in black.

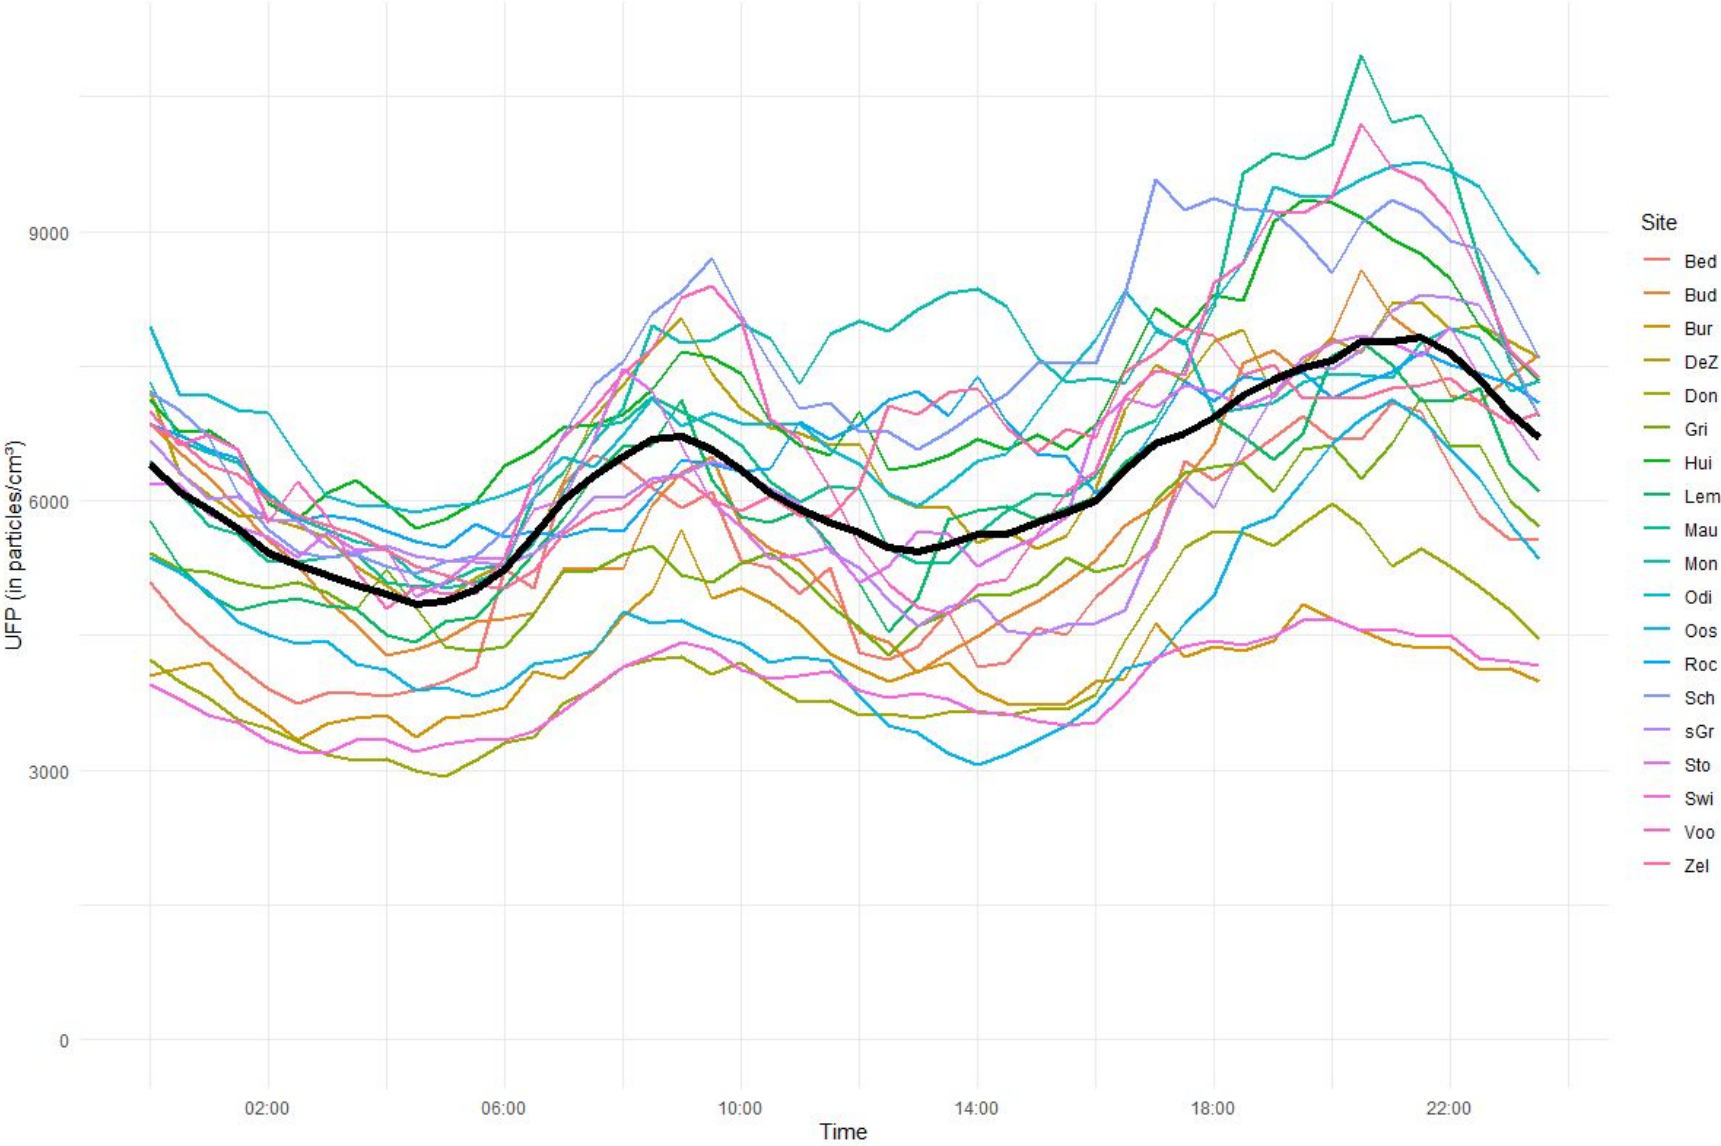

**Table C.3: Difference in UFP (in particles/cm<sup>3</sup>) per site between cold and warm season.**

| <b>Site</b> | <b>Cold Season</b> | <b>Warm Season</b> |
|-------------|--------------------|--------------------|
| <b>Bed</b>  | 5.524              | 2.920              |
| <b>Bud</b>  | 5.840              | NA                 |
| <b>Bur</b>  | 4.262              | 2.852              |
| <b>DeZ</b>  | 6.619              | NA                 |
| <b>Don</b>  | 4.168              | NA                 |
| <b>Gri</b>  | 6.044              | 4.122              |
| <b>Hui</b>  | 6.984              | 10.164             |
| <b>Lem</b>  | 5.925              | NA                 |
| <b>Mau</b>  | 5.807              | 8.924              |
| <b>Mon</b>  | 8.562              | 6.060              |
| <b>Odi</b>  | 7.216              | 7.650              |
| <b>Oos</b>  | 4.669              | NA                 |
| <b>Roc</b>  | 8.035              | 5.664              |
| <b>Sch</b>  | 7.441              | 7.351              |
| <b>sGr</b>  | 6.222              | 5.650              |
| <b>Sto</b>  | 6.186              | 7.091              |
| <b>Swi</b>  | 3.916              | NA                 |
| <b>Voo</b>  | 6.792              | 9.357              |
| <b>Zel</b>  | 7.328              | 5.930              |
